# Supplementary material for: Secure Cyber Defense: An Analysis of Network Intrusion-Based Dataset CCD-IDSv1 with Machine Learning and Deep Learning Models
Source: MDPI journal article supplement (doi:10.3390/electronics10151747), 2021-07-21
Supplement: s1 [file s1]

Archive with 1 entries (1 files):
- electronics-1245986-supplementary.pdf
